# Supplementary material
Source: Springer Nature journal article supplement (https://www.springermedizin.de/resource/supplementary/12913_2011_1931_MOESM3_ESM.pdf/9530084)

# How often do you recommend screening mammography for average risk women?

120

100

80

60

40

20

0

Age 40-49 years

Age 50-69 years

Age 70-89 years

F  
P

I  
M

O  
B  
G

F  
P

I  
M

O  
B  
G

F  
P

I  
M

O  
B  
G

%  
response  
"always  
recommend"

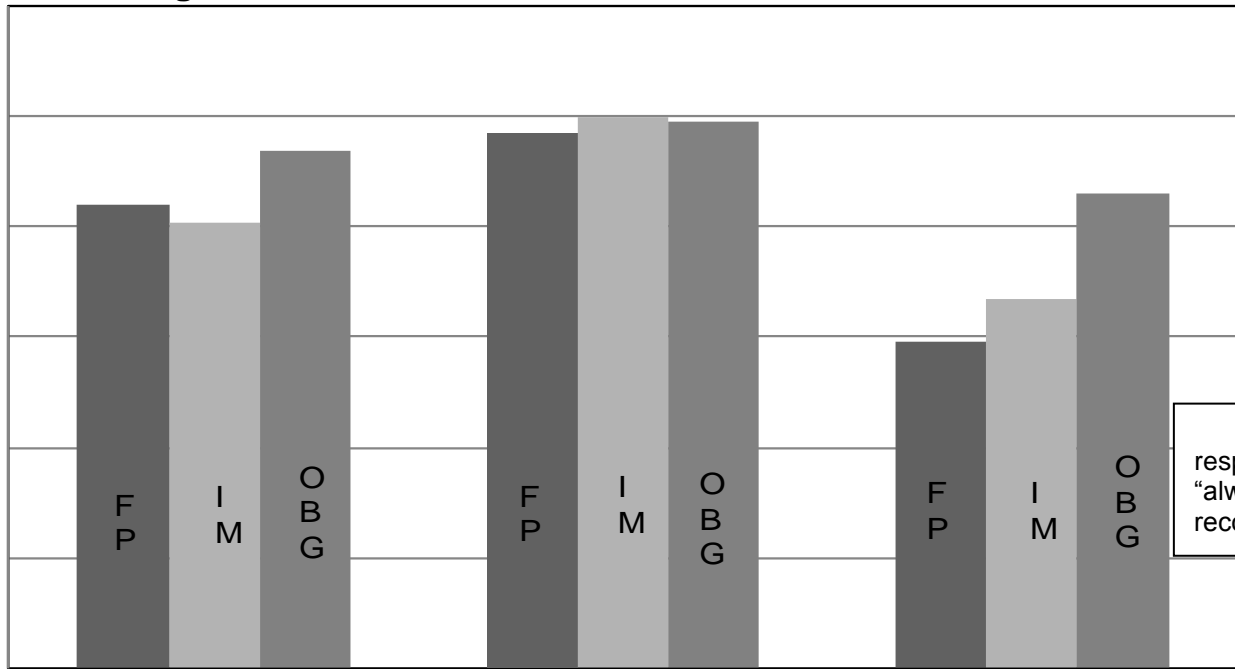

Supplement: MOESM3 [file 9530084]
